# Supplementary material for: Potentially effective drugs for the treatment of COVID-19 or MIS-C in children: a systematic review
Source: bioRxiv or medRxiv preprint supplement (doi:10.1101/2021.07.20.21260827), 2021-09-08
Supplement: Supplementary file [file media-1.pdf]

## Supplementary File 3 Risk of Bias

Table 1. Newcastle-Ottawa Scale

| Study ID                      | SELECTION                                |                                     |                           |                                                                          | COMPARABILITY                                                   | OUTCOME               |                                                 |                                  |
|-------------------------------|------------------------------------------|-------------------------------------|---------------------------|--------------------------------------------------------------------------|-----------------------------------------------------------------|-----------------------|-------------------------------------------------|----------------------------------|
|                               | Representativeness of the Exposed Cohort | Selection of the Non-Exposed Cohort | Ascertainment of Exposure | Demonstration That Outcome of Interest Was Not Present at Start of Study | Comparability of Cohorts on the Basis of the Design or Analysis | Assessment of Outcome | Was Follow-Up Long Enough for Outcomes to Occur | Adequacy of Follow Up of Cohorts |
| Méndez-Echevarría et al. 2020 | *                                        | /                                   | /                         | *                                                                        | /                                                               | /                     | *                                               | *                                |
| Munoz et al. 2021             | *                                        | /                                   | *                         | *                                                                        | *                                                               | /                     | *                                               | *                                |
| Goldman et al. 2021           | *                                        | /                                   | *                         | *                                                                        | *                                                               | *                     | *                                               | *                                |
| García-Salido 2020            | *                                        | *                                   | *                         | *                                                                        | /                                                               | *                     | *                                               | *                                |
| Ouldali 2021                  | *                                        | *                                   | *                         | *                                                                        | *                                                               | *                     | *                                               | *                                |
| Belhadjer 2020                | *                                        | *                                   | *                         | *                                                                        | /                                                               | *                     | /                                               | *                                |

\* means one asterisk, which have been explained in the part of the “Risk of bias assessment”

Table 2. Institute of Health Economics Scale

| Study ID        | Domain 1 | Domain 2 |       |       | Domain 3 |         |       | Domain 4 |       | Domain 5 |         |        |        | Domain 6 | Domain 7 |        |        |        |        | Domain 8 |     |
|-----------------|----------|----------|-------|-------|----------|---------|-------|----------|-------|----------|---------|--------|--------|----------|----------|--------|--------|--------|--------|----------|-----|
|                 | Item1    | Item2    | Item3 | Item4 | Item5    | Item6   | Item7 | Item8    | Item9 | Item10   | Item11  | Item12 | Item13 | Item14   | Item15   | Item16 | Item17 | Item18 | Item19 | Item20   |     |
| Sun et al. 2020 | Yes      | Unclear  | No    | Yes   | Yes      | Partial | Yes   | Partial  | Yes   | Yes      | Unclear | Yes    | No     | Yes      | No       | No     | No     | No     | No     | Yes      | Yes |

Domain 1: Study objective, including: 1. Was the hypothesis/aim/objective of the study clearly stated?; Domain 2: Study design, including: 2. Was the study conducted prospectively?; 3. Were the cases collected in more than one centre?; 4. Were patients recruited consecutively?; Domain 3: Study population, including: 5. Were the characteristics of the patients included in the study described?; 6. Were the eligibility criteria (i.e. inclusion and exclusion criteria) for entry into the study clearly stated?; 7. Did patients enter the study at a similar point in the disease?; Domain 4: Intervention and co-intervention, including: 8. Was the intervention of interest clearly described?; 9. Were additional interventions (co-interventions) clearly described?; Domain 5: Outcome measure, including: 10. Were relevant outcome measures established a priori?; 11. Were outcome assessors blinded to the intervention that patients received?;

12. Were the relevant outcomes measured using appropriate objective/subjective methods?; 13. Were the relevant outcome measures made before and after the intervention?; Domain 6: Statistical analysis, including: 14. Were the statistical tests used to assess the relevant outcomes appropriate?; Domain 7: Results and conclusions, including: 15. Was follow-up long enough for important events and outcomes to occur?; 16. Were losses to follow-up reported?; 17. Did the study provide estimates of random variability in the data analysis of relevant outcomes?; 18. Were the adverse events reported?; 19. Were the conclusions of the study supported by results?; Domain 8: Competing interests and sources of support, including: Were both competing interests and sources of support for the study reported?
