# Supplementary material for: Potentially effective drugs for the treatment of COVID-19 or MIS-C in children: a systematic review
Source: bioRxiv or medRxiv preprint supplement (doi:10.1101/2021.07.20.21260827), 2021-09-08
Supplement: Supplementary file [file media-2.pdf]

**Supplementary File 4 GRADE assessment (Summary of Findings table)**

| Table 1. Remdesivir                                                                  |                      |               |              |                      |                      |               |       |                          |                  |
|--------------------------------------------------------------------------------------|----------------------|---------------|--------------|----------------------|----------------------|---------------|-------|--------------------------|------------------|
| № of studies                                                                         | Certainty assessment |               |              |                      |                      | № of patients |       | Effect Value<br>(95% CI) | Certainty        |
|                                                                                      | Risk of bias         | Inconsistency | Indirectness | Imprecision          | Other considerations | Total         | Event |                          |                  |
| Adverse events                                                                       |                      |               |              |                      |                      |               |       |                          |                  |
| Single-arm Cohort (3)                                                                | Serious <sup>1</sup> | Not serious   | Not serious  | Serious <sup>2</sup> | None                 | 112           | 46    | 37.1% (0.0%, 74.5%)      | ⊕○○○<br>VERY LOW |
| Serious adverse events                                                               |                      |               |              |                      |                      |               |       |                          |                  |
| Single-arm Cohort (3)                                                                | Serious <sup>1</sup> | Not serious   | Not serious  | Serious <sup>2</sup> | None                 | 112           | 21    | 16.2% (1.8%, 30.5%)      | ⊕○○○<br>VERY LOW |
| Extra-corporeal membrane oxygenation (ECMO) or invasive mechanical ventilation (IMV) |                      |               |              |                      |                      |               |       |                          |                  |
| Single-arm Cohort (3)                                                                | Serious <sup>1</sup> | Not serious   | Not serious  | Serious <sup>2</sup> | None                 | 112           | 45    | 37.2% (0%, 76.0%)        | ⊕○○○<br>VERY LOW |
| Mortality                                                                            |                      |               |              |                      |                      |               |       |                          |                  |
| Single-arm Cohort (3)                                                                | Serious <sup>1</sup> | Not serious   | Not serious  | Serious <sup>2</sup> | None                 | 112           | 7     | 5.9% (1.5%, 10.2%)       | ⊕○○○<br>VERY LOW |

| Table 2-1. Glucocorticoids    |                      |               |              |                      |                      |               |              |         |                          |                  |
|-------------------------------|----------------------|---------------|--------------|----------------------|----------------------|---------------|--------------|---------|--------------------------|------------------|
| № of studies                  | Certainty assessment |               |              |                      |                      | № of patients |              |         | Effect Value<br>(95% CI) | Certainty        |
|                               | Risk of bias         | Inconsistency | Indirectness | Imprecision          | Other considerations | Sample        | Intervention | Control |                          |                  |
| Mortality                     |                      |               |              |                      |                      |               |              |         |                          |                  |
| Cohort (1)<br>Case series (1) | Serious <sup>1</sup> | Not serious   | Not serious  | Serious <sup>2</sup> | None                 | 69            | 2/40         | 0/21    | 2.79 (0.13, 60.87)       | ⊕○○○<br>VERY LOW |
| Mechanical ventilation rate   |                      |               |              |                      |                      |               |              |         |                          |                  |

|                               |                      |             |             |                      |      |    |       |      |                    |                  |
|-------------------------------|----------------------|-------------|-------------|----------------------|------|----|-------|------|--------------------|------------------|
| Cohort (1)<br>Case series (1) | Serious <sup>1</sup> | Not serious | Not serious | Serious <sup>2</sup> | None | 69 | 14/40 | 3/21 | 2.83 (0.78, 10.30) | ⊕○○○<br>VERY LOW |
|-------------------------------|----------------------|-------------|-------------|----------------------|------|----|-------|------|--------------------|------------------|

| Table 2-2. Glucocorticoids |                      |               |              |                      |                      |               |              |     |         |                       |                   |                  |
|----------------------------|----------------------|---------------|--------------|----------------------|----------------------|---------------|--------------|-----|---------|-----------------------|-------------------|------------------|
| № of studies               | Certainty assessment |               |              |                      |                      | № of patients |              |     |         | Effect Value (95% CI) | Certainty         |                  |
|                            | Risk of bias         | Inconsistency | Indirectness | Imprecision          | Other considerations | Sample        | Intervention |     | Control |                       |                   |                  |
|                            |                      |               |              |                      |                      |               | Mean         | SD  | Mean    |                       |                   | SD               |
| Duration of PICU admission |                      |               |              |                      |                      |               |              |     |         |                       |                   |                  |
| Cohort (1)                 | Serious <sup>1</sup> | Not serious   | Not serious  | Serious <sup>2</sup> | None                 | 69            | 6.9          | 8.2 | 4.9     | 3.5                   | 2.0 (-0.95, 4.95) | ⊕○○○<br>VERY LOW |

| Table 3-1. IVIG       |                      |               |                      |             |                      |               |              |         |                       |                  |  |  |
|-----------------------|----------------------|---------------|----------------------|-------------|----------------------|---------------|--------------|---------|-----------------------|------------------|--|--|
| № of studies          | Certainty assessment |               |                      |             |                      | № of patients |              |         | Effect Value (95% CI) | Certainty        |  |  |
|                       | Risk of bias         | Inconsistency | Indirectness         | Imprecision | Other considerations | Sample        | Intervention | Control |                       |                  |  |  |
| Treatment failure     |                      |               |                      |             |                      |               |              |         |                       |                  |  |  |
| Cohort (1)            | Serious <sup>1</sup> | Not serious   | Serious <sup>3</sup> | Not serious | None                 | 96            | 3/32         | 24/64   | 0.25 (0.09, 0.70)     | ⊕○○○<br>VERY LOW |  |  |
| Second-line treatment |                      |               |                      |             |                      |               |              |         |                       |                  |  |  |
| Cohort (1)            | Serious <sup>1</sup> | Not serious   | Serious <sup>3</sup> | Not serious | None                 | 96            | 3/32         | 20/64   | 0.19 (0.06, 0.61)     | ⊕○○○<br>VERY LOW |  |  |
| Hemodynamic support   |                      |               |                      |             |                      |               |              |         |                       |                  |  |  |
| Cohort (1)            | Serious <sup>1</sup> | Not serious   | Serious <sup>3</sup> | Not serious | None                 | 96            | 2/32         | 15/64   | 0.21 (0.06, 0.76)     | ⊕○○○<br>VERY LOW |  |  |
| LVEF <55%             |                      |               |                      |             |                      |               |              |         |                       |                  |  |  |
| Cohort (1)            | Serious <sup>1</sup> | Not serious   | Serious <sup>3</sup> | Not serious | None                 | 52            | 2/12         | 14/40   | 0.20 (0.06, 0.66)     | ⊕○○○             |  |  |
