# Supplementary material for: Potentially effective drugs for the treatment of COVID-19 or MIS-C in children: a systematic review
Source: bioRxiv or medRxiv preprint supplement (doi:10.1101/2021.07.20.21260827), 2021-09-08

**Supplementary File 2 PRISMA 2020 flow diagram**

Clinical question 1 (remdesivir)

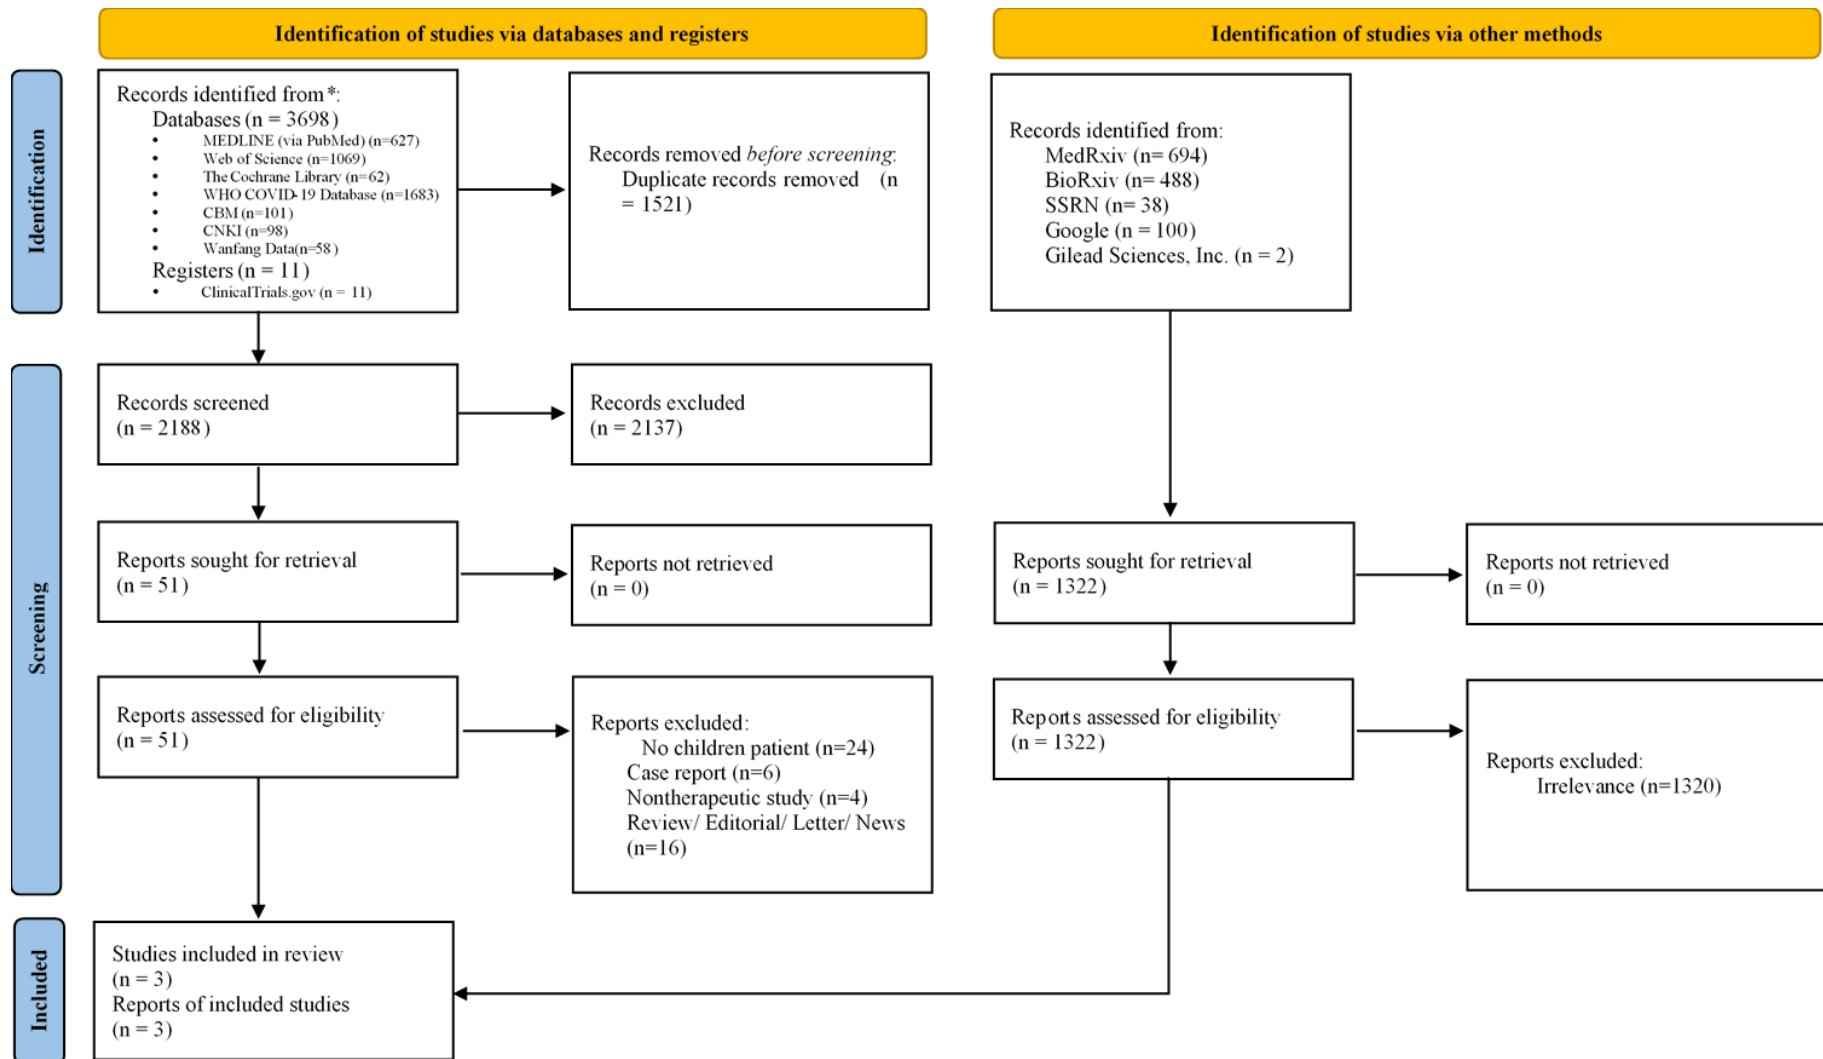

Clinical question 2 (glucocorticoids)

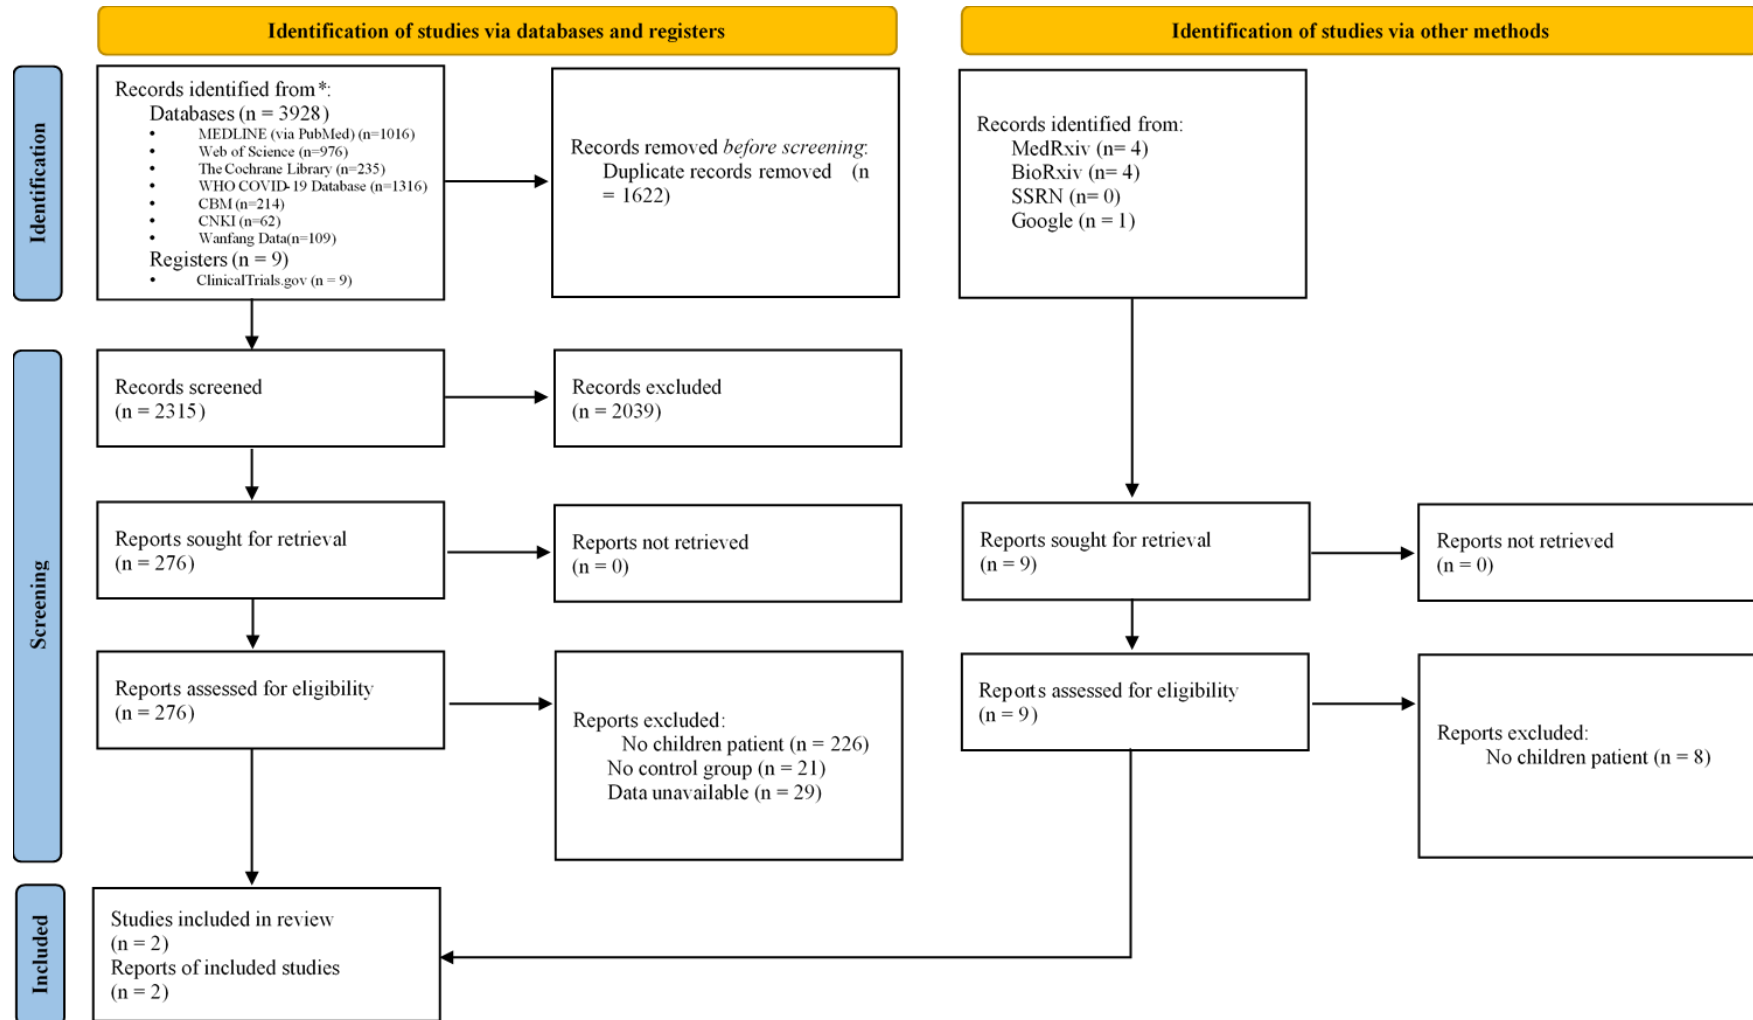

Clinical question 3 (IVIG)

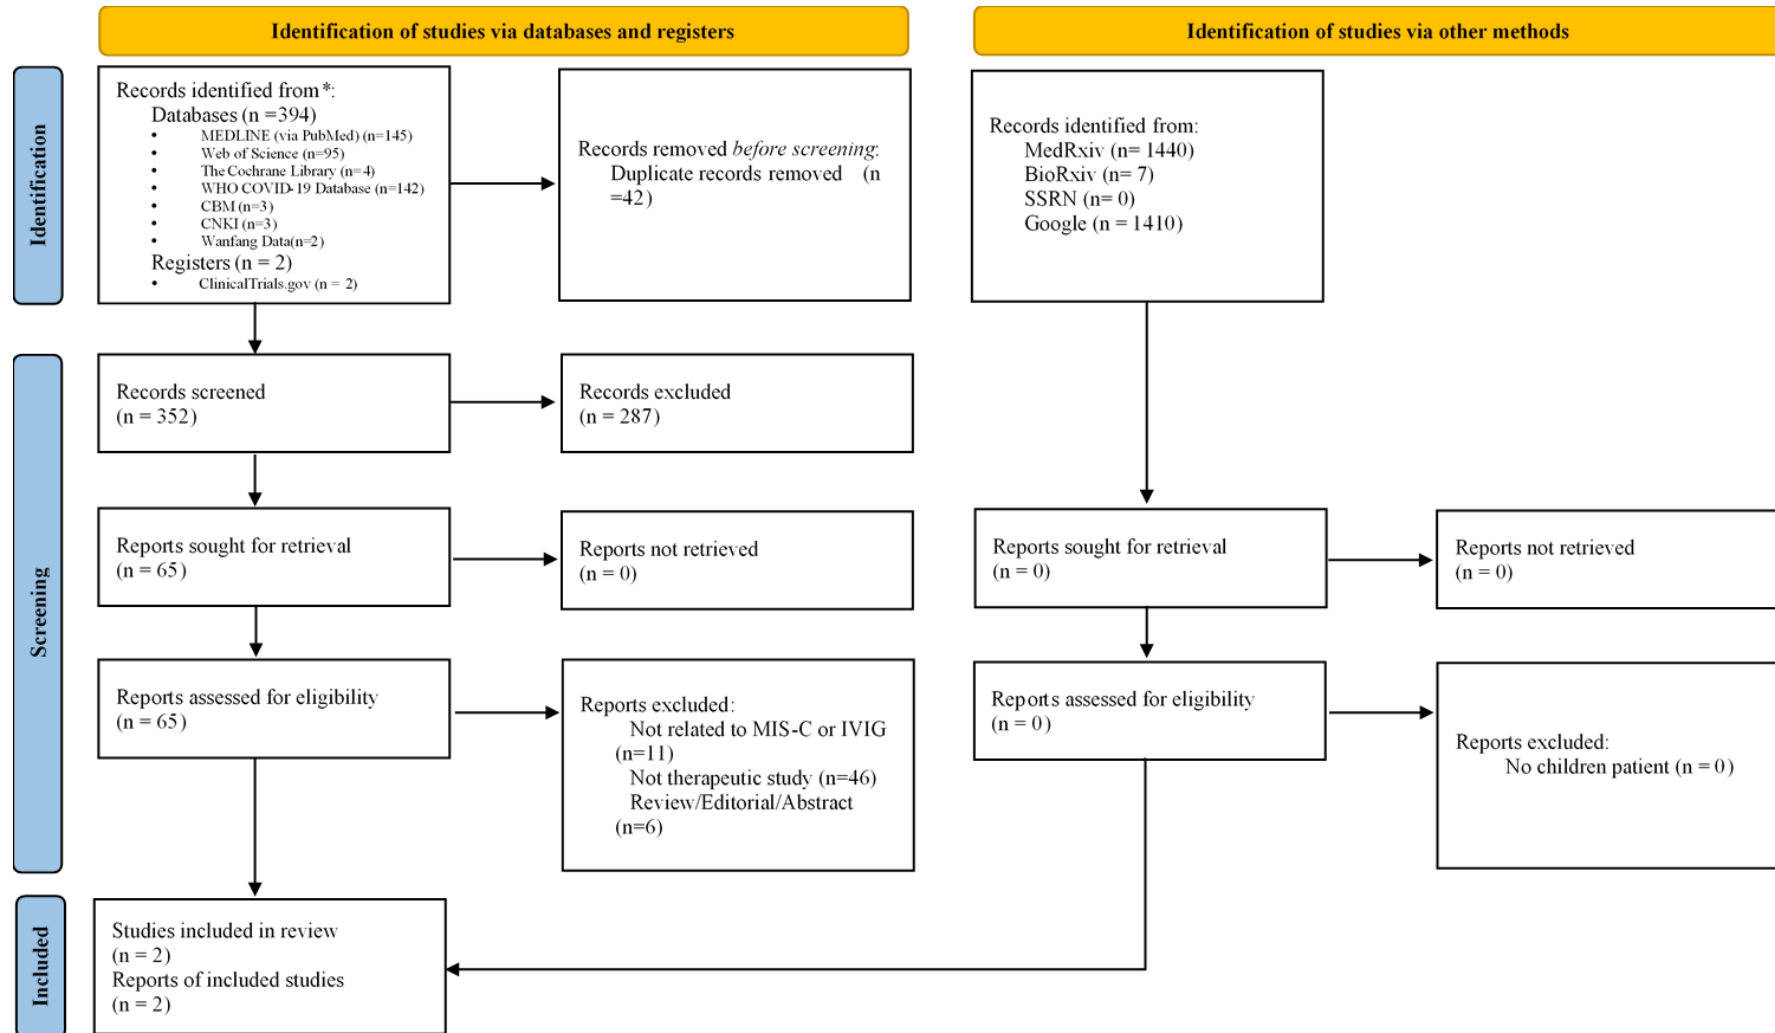

Supplement: Supplementary file [file media-3.pdf]
